# Supplementary material for: Photoreversible luminescence switching of CsPbI3 nanocrystals sensitized by photochromic AgI nanocrystals
Source: Royal Society of Chemistry journal article supplement (doi:10.1039/c8nr09783f), 2019-01-01
Supplement: c8nr09783f1.pdf [file c8nr09783f1.pdf]

## Electronic Supplementary Information

### Photoreversible luminescence switching of CsPbI<sub>3</sub> nanocrystals sensitized by photochromic AgI nanocrystals

Pengli Li,<sup>‡,a</sup> Di Yang,<sup>‡,a</sup> Qixuan Zhong,<sup>a,b</sup> Yong Zhang,<sup>a</sup> Min Chen,<sup>a</sup> Shu Jiang,<sup>a</sup> Jinxing Chen,<sup>a,b</sup> Muhan Cao,<sup>\*,a</sup> Qiao Zhang<sup>\*,a</sup> and Yadong Yin<sup>\*,b</sup>

<sup>a</sup> Institute of Functional Nano and Soft Materials (FUNSOM), Jiangsu Key Laboratory for Carbon-Based Functional Materials and Devices, Joint International Research Laboratory of Carbon-Based Functional Materials and Devices, Soochow University, 199 Ren'ai Road, Suzhou, 215123, Jiangsu, People's Republic of China.

<sup>b</sup> Department of Chemistry, University of California, Riverside, Riverside, California, 92521, United States.

Email: mhcao@suda.edu.cn (M.C.); qiaozhang@suda.edu.cn (Q.Z.); yadongy@ucr.edu (Y.Y.)

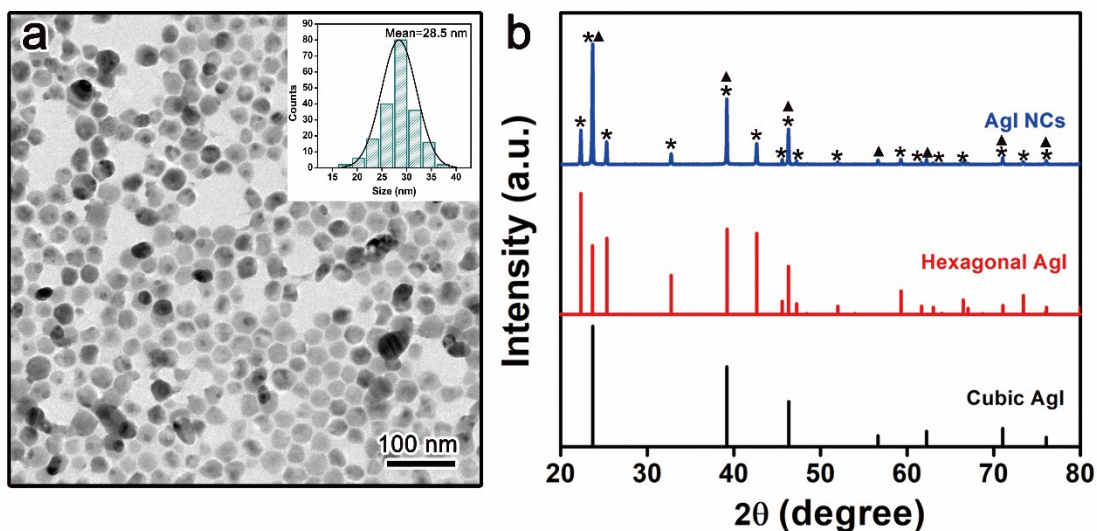

**Fig. S1** (a) TEM image of AgI NCs with an average size of 28.5 nm. The inset shows the corresponding particle size distribution histogram. (b) XRD pattern of the synthesized AgI NCs with a mixture phase of hexagonal and cubic phases. The standard XRD patterns for hexagonal AgI (JCPDS No. 78-1613) and cubic AgI (JCPDS No. 78-0641) are also present in the bottom. The peaks corresponding to the hexagonal AgI and cubic AgI are marked with asterisks and triangles, respectively.

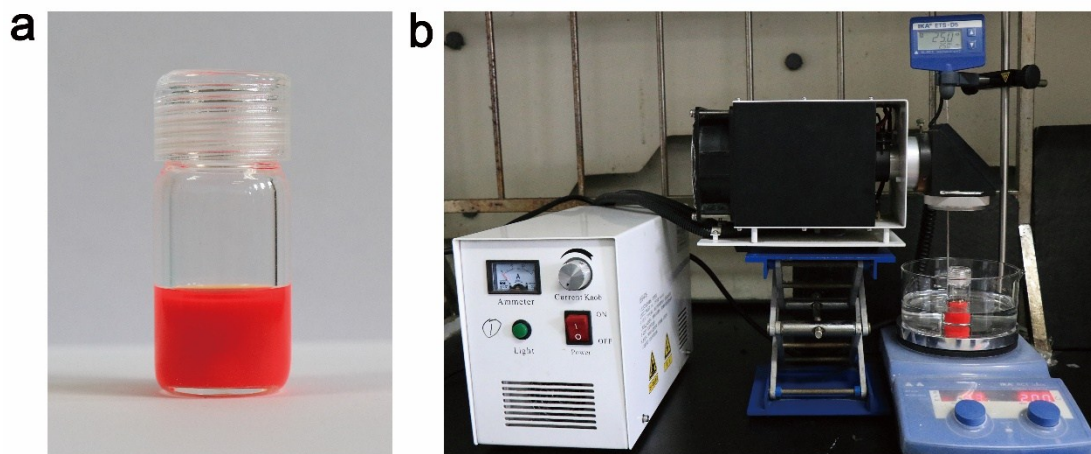

**Fig. S2** Photographs of (a) customized quartz vial loading the mixture solution of CsPbI<sub>3</sub> NCs and AgI NCs; and (b) the reaction set-up.

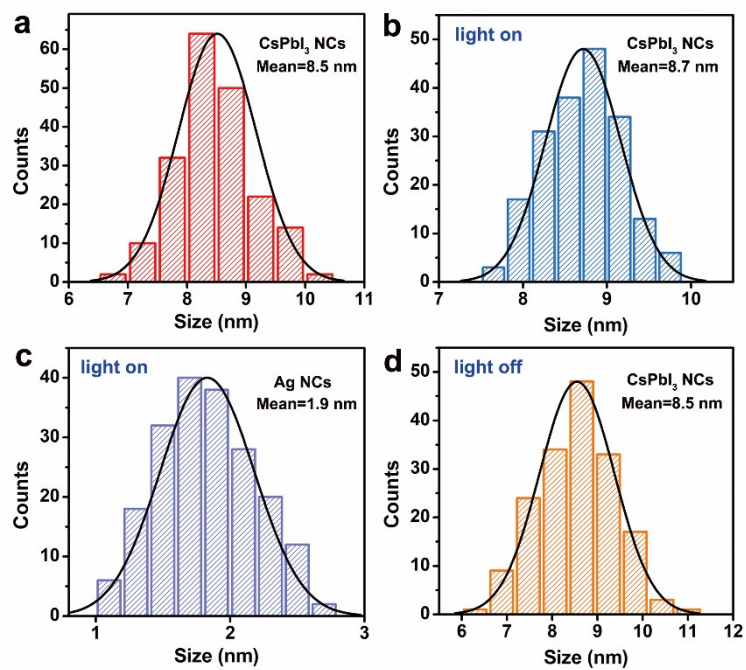

**Fig. S3** (a-d) Size distribution histogram of CsPbI<sub>3</sub> NCs (a) before and (b) after light irradiation, (c) generated Ag NCs after illumination, (d) CsPbI<sub>3</sub> NCs after light off.

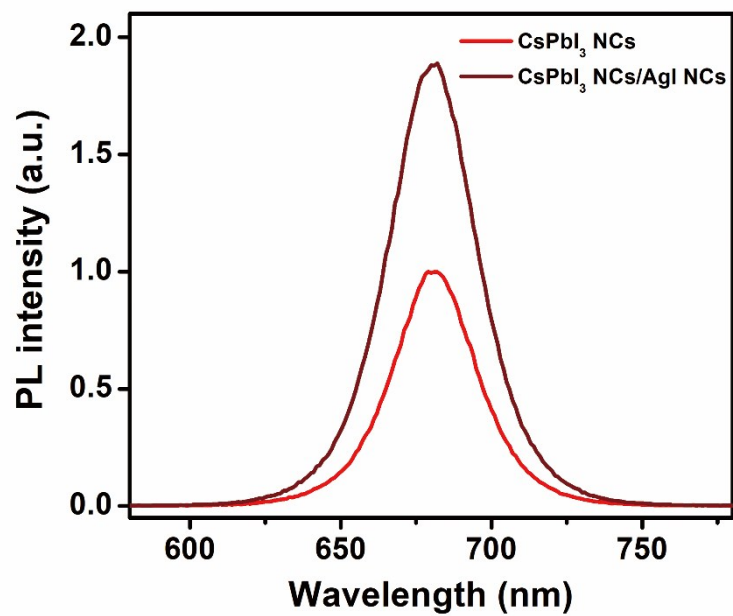

**Fig. S4** PL spectra of CsPbI<sub>3</sub> NCs (red curve) and the mixture of CsPbI<sub>3</sub> and AgI NCs (brown curve) after stirring in dark condition for 20 min.

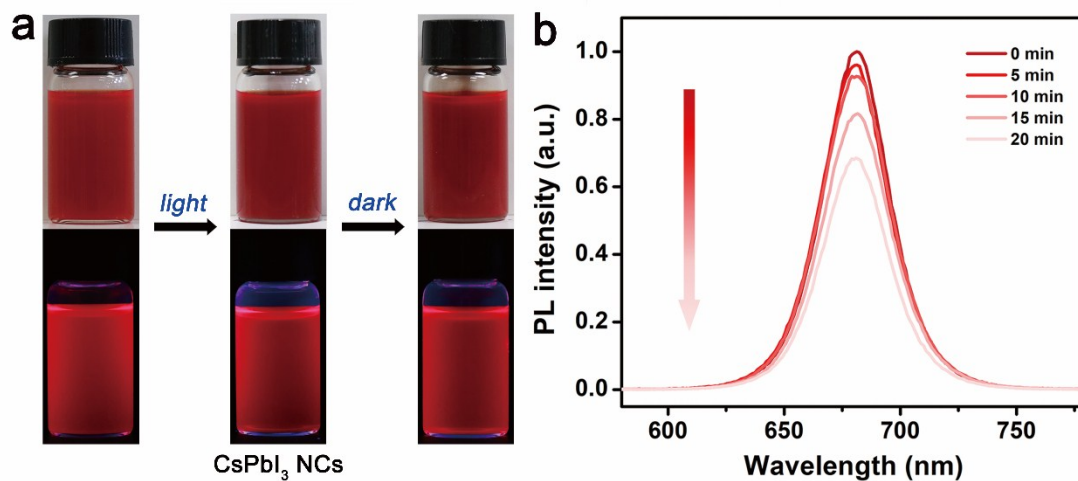

**Fig. S5** (a) Photographs of the solution containing CsPbI<sub>3</sub> NCs after light on/off treatment. Photos were taken under daylight and UV light ( $\lambda=365$  nm), respectively. (b) PL spectra of CsPbI<sub>3</sub> NCs during the light irradiation process.

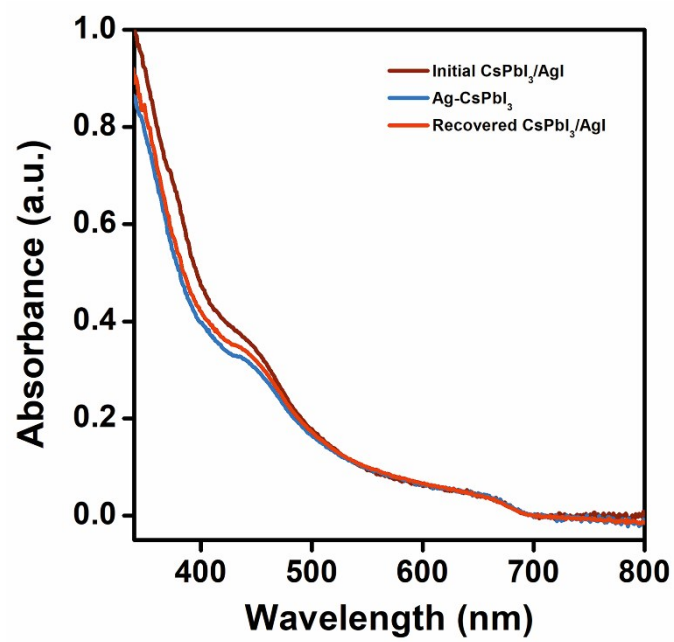

**Fig. S6** The UV-vis spectra of initial CsPbI<sub>3</sub>, Ag-CsPbI<sub>3</sub> obtained after irradiating for 20 min, and CsPbI<sub>3</sub> NCs after stored in dark for one hour.

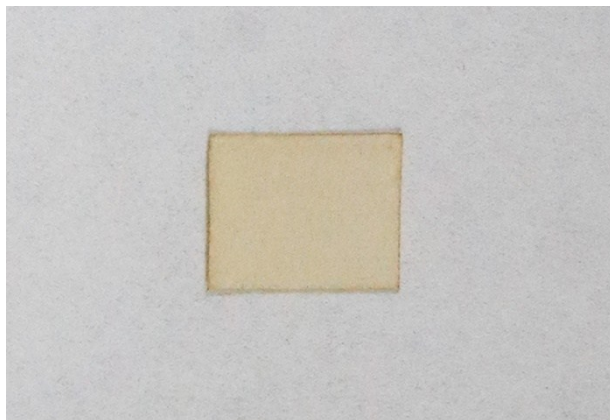

**Fig. S7** Photograph of starch paper treated in CsPbI<sub>3</sub> and AgI mixture solution after stored in the dark for 1 hour.



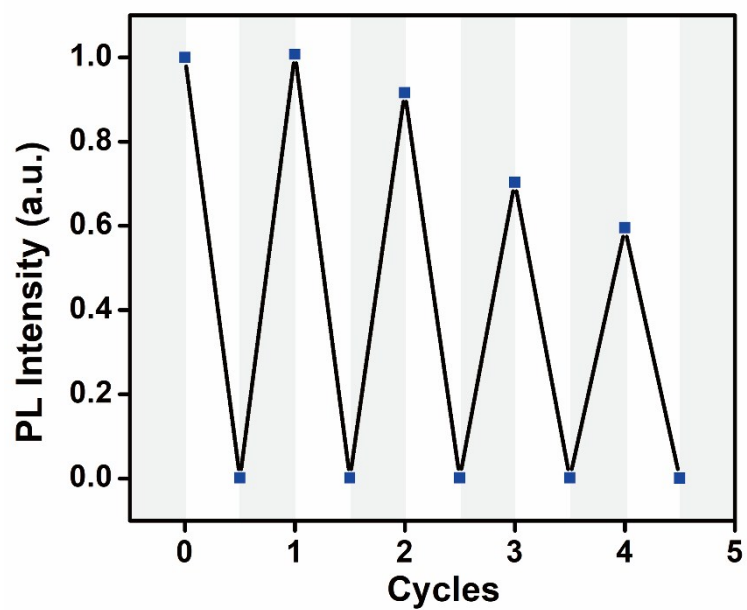

**Fig. S8** The PL intensity change in CsPb(Br/I)<sub>3</sub> and AgI hybrid system in light on/off cycles. The white parts and grey shades represent light on and light off, respectively.

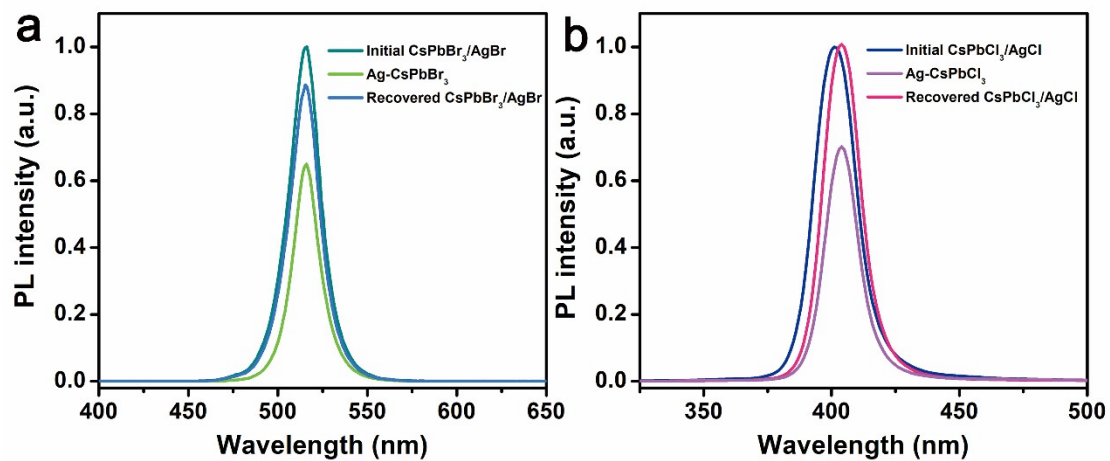

**Fig. S9** PL spectra of (a) CsPbBr<sub>3</sub>/AgBr and (b) CsPbCl<sub>3</sub>/AgCl systems after irradiating for 20 min and then stored in dark for one hour.

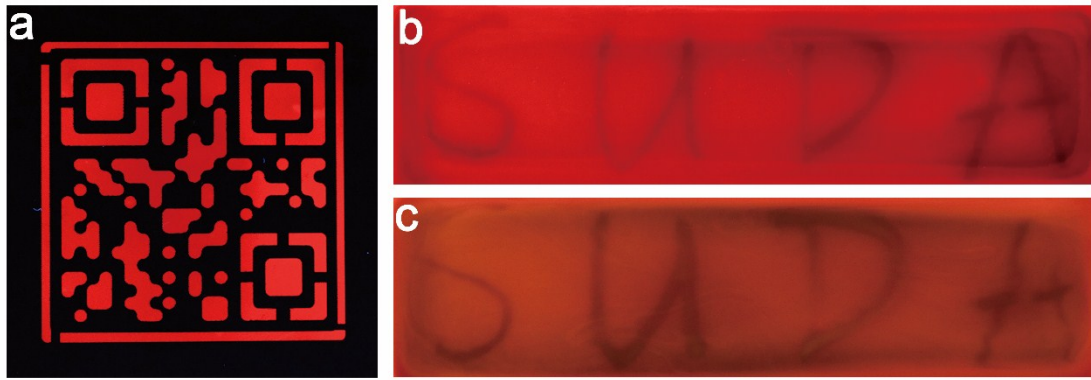

**Fig. S10** (a) Photographs showing the rewritable plate covered by a mask with a QR code pattern under UV light ( $\lambda=365$  nm) before irradiation. Photos of rewritable plates showing characters of “SUDA” in (b) CsPbI<sub>3</sub> and (c) CsPb(Br/I)<sub>3</sub> systems after irradiation for 5 min.
